# Supplementary material
Source: bioRxiv or medRxiv preprint supplement (https://medrxiv.org/highwire/filestream/80178/field_highwire_adjunct_files/0/2020.04.09.20059345-1.pdf)

## Supplementary Materials for Santamaría & Hortal, “Chasing the ghost of infection past: identifying thresholds of change during the COVID-19 infection in Spain”

**Supplementary Table S1.** Detailed timeline of the outbreak and management measures in Spain. Based on Ravelo & Jerving (2020) plus local sources.

| Date       | Outbreak dynamics                                                                                                                                                                                                                       | Key events & management measures                                                                                                                                           |
|------------|-----------------------------------------------------------------------------------------------------------------------------------------------------------------------------------------------------------------------------------------|----------------------------------------------------------------------------------------------------------------------------------------------------------------------------|
| 28/1/20    |                                                                                                                                                                                                                                         | The Spanish Ministry of Health publishes a protocol for the management of potential COVID cases, including 14-days quarantine following contact with infected individuals. |
| 31/1/20    | First case detected in Spain: a German tourist in Canary Islands                                                                                                                                                                        | Iberia cancels all flights to China. Spanish from Wuhan quarantined in Madrid.<br>Arrival of Wuhan Zall football team to Málaga for a training camp in Cádiz.              |
| 9/2/20     | Second case detected in Spain: an English tourist in Mallorca                                                                                                                                                                           |                                                                                                                                                                            |
| 12/2/20    |                                                                                                                                                                                                                                         | World Mobile Congress cancelled in Barcelona                                                                                                                               |
| 13/2/20    | First deceased in Valencia, will be detected in necropsy on 4/3/20                                                                                                                                                                      |                                                                                                                                                                            |
| 14/2/20    | Latest possible infection of a woman from Torrejón (Madrid) who travelled to Ecuador on 14/2 and developed her first symptoms on 16/2                                                                                                   |                                                                                                                                                                            |
| 15/2/20    | One case hospitalized in Madrid, will be tested and detected on 28/2/20                                                                                                                                                                 |                                                                                                                                                                            |
| 19/2/20    |                                                                                                                                                                                                                                         | 2,500 Valencia soccer fans mixed with 40,000 Atalanta supporters for a Champions League game in Bergamo                                                                    |
| 20-21/2/20 |                                                                                                                                                                                                                                         | National guidelines for the identification, sampling/testing, registration and treatment of COVID cases, distributed by regional governments                               |
| 22/2/20    | Return to Barcelona of a tourist who got infected in Italy, will be tested and confirmed on 24/2/20                                                                                                                                     |                                                                                                                                                                            |
| 23/2/20    | Italy becomes largest outbreak outside Asia                                                                                                                                                                                             | Guidelines on the <a href="#">prevention and control during the management of COVID patients</a> published by the Ministry of Health                                       |
| 24/2/20    | 3rd case detected, an Italian doctor spending holiday in Tenerife.<br>Largest infection event known in Spain: 60 persons from La Rioja and Alava get infected during a funeral. Cases will be detected on 7/4/20.                       |                                                                                                                                                                            |
| 25/2/20    | First cases in inland Spain, at Madrid, Barcelona and Castellón<br>First school teacher taking sick leave, will be hospitalized on 1/3/20                                                                                               | Updated guidelines for the identification, sampling/testing, registration and treatment of COVID cases distributed by regional governments                                 |
| 26/2/20    | First reported case in Andalusia                                                                                                                                                                                                        | <i>The EC requests member states to review pandemic preparedness plans and inform back on how they plan to implement them</i>                                              |
| 27/2/20    | 8 new cases of Italian/Iranian origin in Catalonia, Castilla-León & Valencia.<br>In Valencia, 4 out of 6 new cases were infected by a sport journalist who attended Bergamo on 19/2/20, got sick on 25/2/20 and hospitalized on 27/2/20 |                                                                                                                                                                            |
| 28/2/20    | 9 new cases in Andalusia and 1 more in Madrid (already hospitalized but not tested on 15/2/20).                                                                                                                                         | <b>Preventive isolation measures</b> for SARS-CoV-2 (quarantine) will be considered as temporary incapacity by Social Security                                             |

|          |                                                                                                                                                                                                                                       |                                                                                                                                                                                                                                                                                                                                                                                                                                                             |
|----------|---------------------------------------------------------------------------------------------------------------------------------------------------------------------------------------------------------------------------------------|-------------------------------------------------------------------------------------------------------------------------------------------------------------------------------------------------------------------------------------------------------------------------------------------------------------------------------------------------------------------------------------------------------------------------------------------------------------|
|          | Infection cluster at Igalada, including a large group of health professionals from Igalada hospital                                                                                                                                   | 1 <sup>st</sup> version of the <a href="#">Protocol for the clinical management of COVID at ICUs, hospitals and primary care</a> published by the Ministry of Health, updated on 9/3/20 and 19/3/20                                                                                                                                                                                                                                                         |
| 1-2/3/20 | Infection of the group of 60 persons from La Rioja and Alava during a funeral gets detected<br>Group infection of 7 persons at a christian church in Leganés (Madrid) and cluster of 6 local infections at Torrejón de Ardoz (Madrid) |                                                                                                                                                                                                                                                                                                                                                                                                                                                             |
| 3/3/20   | 150 cases, of which 49 in Madrid, 15 in Catalonia and Valencia, 13 in Basque Country. First death in Madrid, not confirmed until 5 March                                                                                              | Government announces intention to declare moderate social-distancing measures in Madrid and Basque Country                                                                                                                                                                                                                                                                                                                                                  |
| 4/3/20   | First cases of community transmission detected in Catalonia                                                                                                                                                                           | <b>Soft social-distancing measures:</b> The Labour Ministry publishes <a href="#">guidelines for COVID prevention at work</a> , including temporary cessation of activity (complete <a href="#">guide here</a> ).                                                                                                                                                                                                                                           |
| 5/3/20   | 10 persons infected in a nursing home for the elderly, following the death of one person on 3/3/20.<br>1 dead & 20 infected in a nursing home at Valdemoro (Madrid)                                                                   | The Health Ministry publishes a set of <a href="#">guidelines for the prevention of COVID exposure by occupational risk services</a>                                                                                                                                                                                                                                                                                                                        |
| 6/3/20   |                                                                                                                                                                                                                                       | The Spanish Episcopal Conference mandates prevention measures at Catholic churches                                                                                                                                                                                                                                                                                                                                                                          |
| 7/3/20   |                                                                                                                                                                                                                                       | Madrid: closure of nursing homes for the elderly, following infections in two of them.<br>La Rioja: lockdown in Haro due to a concentration of cases                                                                                                                                                                                                                                                                                                        |
| 8/3/20   | 674 cases and 10 deceased                                                                                                                                                                                                             | Sports events, political party conferences and IWD demonstrations. In the nationwide meeting of the far-right party Vox, its General Secretary JOS was already infected and symptomatic (will test positive on 10/3/20).                                                                                                                                                                                                                                    |
| 9/3/20   |                                                                                                                                                                                                                                       | <b>Moderate social-distancing measures at Madrid:</b> closure of kindergartens, schools and universities. Catalanian government bans all events with >1,000 persons<br>The Basque government closes all schools in Vitoria and Labastida.                                                                                                                                                                                                                   |
| 10/3/20  |                                                                                                                                                                                                                                       | <i>Italy declares national lockdown</i><br>Champion League Match between Valencia and Atlanta de Bérgamo in Valencia<br><b>Moderate social-distancing measures in Spain:</b><br>Ban on all air travel to/from Italy<br>Ban on all indoor activities with more than 1,000 persons at Madrid, La Rioja, Vitoria & Labastida<br><b>Moderate social-distancing measures at Madrid, La Rioja and Vitoria,</b> including the closure of schools and universities. |
| 11/3/20  |                                                                                                                                                                                                                                       | <i>WHO declares COVID-19 outbreak an international pandemic</i><br>Closure of national Congress and Senate, and regional parliaments of Madrid and Andalusia<br>3,000 Atlético de Madrid fans flew together for a Champions League match in Liverpool                                                                                                                                                                                                       |
| 12/3/20  |                                                                                                                                                                                                                                       | <b>Moderate social-distancing mandated by all regional governments:</b> Nationwide closure of schools and universities. Confinement of four municipalities in Catalonia.                                                                                                                                                                                                                                                                                    |

|         |                                                                                       |                                                                                                                                                                                                     |
|---------|---------------------------------------------------------------------------------------|-----------------------------------------------------------------------------------------------------------------------------------------------------------------------------------------------------|
|         |                                                                                       | The central gov't launch a package of measures to mitigate the economic impact of the outbreak ( <a href="#">Real Decreto-ley 7/2020, de 12 de marzo</a> ).                                         |
| 13/3/20 | WHO considers Europe the new epicenter of the pandemic.                               | Government announces <b>national lockdown</b> , pending on the decree's approval.<br>Catalonia closes the regional borders.                                                                         |
| 14/3/20 |                                                                                       | <b>Nationwide lockdown:</b> <a href="#">Real Decreto 463/2020</a> por el que se declara el estado de alarma para la gestión de la situación de crisis sanitaria ocasionada por el COVID-19          |
| 15/3/20 | Valencia FC acknowledges that its players and technical staff got infected on 19/2/20 |                                                                                                                                                                                                     |
| 16/3/20 |                                                                                       | Ford Motor Co. closes factory in Valencia employing 5,4000 people, after three workers test positive for coronavirus                                                                                |
| 17/3/20 |                                                                                       | <i>EU restricts non-essential travel from/to its countries</i><br>Spain closes all its land borders                                                                                                 |
| 18/3/20 |                                                                                       | Protocols for the <a href="#">disinfection of spaces and surfaces in contact with suspected or confirmed COVID patients</a> published by Madrid regional government                                 |
| 19/3/20 | Italy overtakes China for the largest number of deaths from the pandemic              |                                                                                                                                                                                                     |
| 21/3/20 |                                                                                       | Government announces the purchase of 640,000 rapid tests. >350,000 tests have already been conducted.                                                                                               |
| 22/3/20 |                                                                                       | Nationwide lockdown extended for another 15 days.<br>Opening of IFEMA's temporary hospital, with 5,500 beds, in Madrid                                                                              |
| 24/3/20 |                                                                                       | Emergency Military Units enter retirement homes, where mortality was rocketing, to assist their elderly patients.<br>Madrid ice rink adapted as makeshift mortuary to cope with the high mortality. |
| 25/3/20 |                                                                                       |                                                                                                                                                                                                     |
| 26/3/20 |                                                                                       | Closure of hotels and short-stay accommodation (such as short-stay campsites or caravan parks)                                                                                                      |
| 27/3/20 |                                                                                       | Madrid launches emergency action plan at nursing homes, which accumulate >50% of Madrid's mortality.                                                                                                |
| 29/3/20 |                                                                                       | Strengthened nationwide lockdown: closure of the workplaces of companies that do not provide essential services                                                                                     |
| 1/4/20  | Spain surpasses 100,000 infections                                                    |                                                                                                                                                                                                     |
| 2/4/20  |                                                                                       | Emergency Military Units asked to assist disinfecting 84 retirement homes in Catalonia, owing to the high mortality and infection rate                                                              |
| 3/4/20  | COVID basic reproduction number <1.0 for the first time in Spain.                     |                                                                                                                                                                                                     |

**Supplementary Table S2.** Parameter estimates of segmented regressions fitted on the total number of cases detected in Spain and the two autonomous regions hosting its two largest cities (Madrid and Catalonia) from 25/2/20 to 13/04/20, using the segmented and lme4 packages of R 3.6.3 (R Core Team 2020). Within this period, data series varies among variables and regions, since they start at the first day with >10 cases or >1 death. rDev: residual deviance. RL: relative likelihood.

| Cases in Spain |            |              |              |              |              |              |              |                     |             |             |             |             |                 |    |        |          |        |          |        |  |  |  |
|----------------|------------|--------------|--------------|--------------|--------------|--------------|--------------|---------------------|-------------|-------------|-------------|-------------|-----------------|----|--------|----------|--------|----------|--------|--|--|--|
| Model          | Intercepts |              |              | Slopes       |              |              |              | Breakpoints (#days) |             |             |             |             | Goodness of fit |    |        |          |        |          |        |  |  |  |
|                | a1         | b1           | b2           | b3           | b4           | b5           | b6           | u1                  | u2          | u3          | u4          | u5          | rDev            | df | Scale  | P        | AIC    | RL       | BIC    |  |  |  |
| M0             | 7.532e+003 | 0.0997e+0028 |              |              |              |              |              |                     |             |             |             |             | 284753          | 47 | 6058.6 | 0.0      | 285285 | 0        | 285289 |  |  |  |
| M1             | 4.774e+009 | 0.2017e+0003 | 0.0487e+0001 |              |              |              |              | 32.403e+018         |             |             |             |             | 17444           | 45 | 387.6  | 0.0      | 17980  | 0        | 17987  |  |  |  |
| M2             | 2.371e+035 | 0.3351e+0020 | 0.1565e+0004 | 0.0438e+0002 |              |              |              | 20.620e+052         | 34.578e+024 |             |             |             | 4776            | 43 | 111.1  | 0.0      | 5316   | 0        | 5327   |  |  |  |
| M3             | 2.169e+041 | 0.3493e+0024 | 0.1745e+0006 | 0.0843e+0005 | 0.0333e+0003 |              |              | 19.492e+061         | 31.555e+043 | 39.341e+054 |             |             | 658             | 41 | 16.1   | 2.88E-12 | 1202   | 3.70E-75 | 1217   |  |  |  |
| M4*            | 2.169e+041 | 0.3493e+0024 | 0.1745e+0006 | 0.0880e+0006 | 0.0421e+0006 | 0.0261e+0008 |              | 19.492e+061         | 31.437e+046 | 38.359e+073 | 44.623e+196 |             | 437             | 39 | 11.2   | 7.83E-39 | 986    | 4.23E-28 | 1005   |  |  |  |
| M5*            | 2.064e+046 | 0.3571e+0029 | 0.2059e+0032 | 0.1669e+0009 | 0.0936e+0011 | 0.0584e+0009 | 0.0314e+0004 | 18.513e+102         | 23.923e+261 | 31.521e+065 | 36.846e+119 | 41.322e+114 | 307             | 37 | 8.3    | 2.48E-38 | 860    |          | 882    |  |  |  |

\*fitted using seed breakpoint values

| Deaths in Spain |            |              |              |              |              |              |              |                     |             |             |             |             |                 |    |       |           |       |           |       |  |  |  |
|-----------------|------------|--------------|--------------|--------------|--------------|--------------|--------------|---------------------|-------------|-------------|-------------|-------------|-----------------|----|-------|-----------|-------|-----------|-------|--|--|--|
| Model           | Intercepts |              |              | Slopes       |              |              |              | Breakpoints (#days) |             |             |             |             | Goodness of fit |    |       |           |       |           |       |  |  |  |
|                 | a1         | b1           | b2           | b3           | b4           | b5           | b6           | u1                  | u2          | u3          | u4          | u5          | rDev            | df | Scale | P         | AIC   | RL        | BIC   |  |  |  |
| M0              | 5.434e+009 | 0.1119e+0003 |              |              |              |              |              |                     |             |             |             |             | 25815           | 40 | 645.4 | 0.0       | 26184 | 0         | 26187 |  |  |  |
| M1              | 2.487e+032 | 0.2441e+0014 | 0.0584e+0005 |              |              |              |              | 26.470e+051         |             |             |             |             | 1177            | 38 | 31.0  | 2.86E-222 | 1550  | 7.91E-249 | 1557  |  |  |  |
| M2              | 1.979e+045 | 0.2730e+0022 | 0.1241e+0023 | 0.0474e+0007 |              |              |              | 23.301e+104         | 30.965e+137 |             |             |             | 312             | 36 | 8.7   | 1.32E-45  | 688   | 9.49E-62  | 680   |  |  |  |
| M3              | 0.282e+173 | 0.4166e+0153 | 0.2412e+0026 | 0.1131e+0022 | 0.0453e+0008 |              |              | 13.380e+302         | 24.415e+116 | 31.709e+145 |             |             | 87              | 34 | 2.6   | 1.51E-6   | 468   | 6.97E-14  | 482   |  |  |  |
| M4*             | 0.282e+173 | 0.4166e+0153 | 0.2472e+0032 | 0.1473e+0060 | 0.0884e+0024 | 0.0419e+0010 | 0.0345e+0024 | 13.192e+310         | 23.417e+199 | 27.694e+277 | 33.374e+205 |             | 43              | 32 | 1.3   | 0.10      | 427   | 0.000045  | 445   |  |  |  |
| M5*             | 0.282e+173 | 0.4166e+0153 | 0.2472e+0032 | 0.1473e+0060 | 0.0985e+0047 | 0.0550e+0021 | 0.0346e+0024 | 13.192e+310         | 23.417e+199 | 27.359e+349 | 31.714e+306 | 37.395e+493 | 19              | 30 | 0.6   | 0.95      | 407   |           | 428   |  |  |  |

\*fitted using seed breakpoint values

| Cases in Madrid |            |              |              |              |              |              |              |                     |             |             |             |             |                 |    |        |           |       |           |       |  |  |  |
|-----------------|------------|--------------|--------------|--------------|--------------|--------------|--------------|---------------------|-------------|-------------|-------------|-------------|-----------------|----|--------|-----------|-------|-----------|-------|--|--|--|
| Model           | Intercepts |              |              | Slopes       |              |              |              | Breakpoints (#days) |             |             |             |             | Goodness of fit |    |        |           |       |           |       |  |  |  |
|                 | a1         | b1           | b2           | b3           | b4           | b5           | b6           | u1                  | u2          | u3          | u4          | u5          | rDev            | df | Scale  | P         | AIC   | RL        | BIC   |  |  |  |
| M0              | 7.056e+004 | 0.0923e+0001 |              |              |              |              |              |                     |             |             |             |             | 68368           | 42 | 1627.8 | 0.0       | 68825 | 0         | 68829 |  |  |  |
| M1              | 5.221e+012 | 0.1768e+0005 | 0.0473e+0003 |              |              |              |              | 27.380e+038         |             |             |             |             | 8495            | 40 | 212.4  | 0.0       | 8956  | 0         | 8963  |  |  |  |
| M2              | 2.707e+051 | 0.3784e+0042 | 0.1238e+0005 | 0.0365e+0004 |              |              |              | 14.681e+065         | 31.554e+052 |             |             |             | 1287            | 38 | 33.9   | 1.92E-245 | 1752  | 1.15E-218 | 1763  |  |  |  |
| M3              | 2.707e+051 | 0.3784e+0042 | 0.1377e+0008 | 0.0821e+0011 | 0.0302e+0005 |              |              | 14.294e+068         | 27.211e+125 | 34.617e+105 |             |             | 394             | 36 | 10.9   | 8.90E-62  | 863   | 1.30E-25  | 877   |  |  |  |
| M4              | 2.707e+051 | 0.3784e+0042 | 0.1377e+0008 | 0.0852e+0015 | 0.0406e+0010 | 0.0170e+0021 |              | 14.294e+068         | 27.055e+143 | 33.625e+141 | 40.168e+273 |             | 289             | 34 | 8.5    | 3.13E-42  | 762   | 0.00098   | 780   |  |  |  |
| M5*             | 2.253e+095 | 0.4383e+0111 | 0.3156e+0072 | 0.1367e+0009 | 0.0852e+0015 | 0.0406e+0010 | 0.0170e+0021 | 10.046e+325         | 15.015e+089 | 27.104e+146 | 33.625e+141 | 40.168e+273 | 271             | 32 | 8.5    | 1.00E-39  | 748   |           | 770   |  |  |  |

\*fitted using seed breakpoint values

| Deaths in Madrid |            |              |              |              |              |              |              |                     |             |             |             |             |                 |    |       |           |       |           |       |  |  |  |
|------------------|------------|--------------|--------------|--------------|--------------|--------------|--------------|---------------------|-------------|-------------|-------------|-------------|-----------------|----|-------|-----------|-------|-----------|-------|--|--|--|
| Model            | Intercepts |              |              | Slopes       |              |              |              | Breakpoints (#days) |             |             |             |             | Goodness of fit |    |       |           |       |           |       |  |  |  |
|                  | a1         | b1           | b2           | b3           | b4           | b5           | b6           | u1                  | u2          | u3          | u4          | u5          | rDev            | df | Scale | P         | AIC   | RL        | BIC   |  |  |  |
| M0               | 5.155e+012 | 0.0992e+0004 |              |              |              |              |              |                     |             |             |             |             | 11109           | 38 | 292.3 | 0.0       | 11443 | 0         | 11446 |  |  |  |
| M1               | 2.379e+043 | 0.2335e+0022 | 0.0484e+0007 |              |              |              |              | 23.347e+079         |             |             |             |             | 651             | 36 | 18.1  | 7.88E-114 | 988   | 1.05E-131 | 995   |  |  |  |
| M2               | 0.535e+154 | 0.4131e+0136 | 0.1759e+0024 | 0.0439e+0008 |              |              |              | 13.438e+205         | 25.302e+108 |             |             |             | 237             | 34 | 7.0   | 2.31E-32  | 579   | 7.36E-43  | 589   |  |  |  |
| M3               | 0.039e+221 | 0.4755e+0230 | 0.2215e+0042 | 0.0936e+0028 | 0.0354e+0013 |              |              | 11.259e+271         | 15.522e+176 | 29.551e+249 |             |             | 77              | 32 | 2.4   | 0.000015  | 422   | 7.87E-09  | 436   |  |  |  |
| M4               | 0.039e+221 | 0.4755e+0230 | 0.2349e+0066 | 0.1440e+0069 | 0.0705e+0030 | 0.0325e+0017 |              | 11.016e+291         | 19.610e+350 | 24.670e+312 | 31.435e+386 |             | 37              | 30 | 1.2   | 0.19      | 386   | 0.53      | 403   |  |  |  |
| M5*              | 0.039e+221 | 0.4755e+0230 | 0.2292e+0052 | 0.1380e+0095 | 0.0732e+0039 | 0.0419e+0044 | 0.0254e+0040 | 11.115e+279         | 20.107e+355 | 24.723e+398 | 30.336e+585 | 35.729e+044 | 31              | 28 | 1.1   | 0.30      | 385   |           | 405   |  |  |  |

\*fitted using seed breakpoint values

| Cases in Catalonia |            |              |              |              |              |              |              |                     |             |             |             |             |                 |     |        |           |          |           |       |     |  |  |
|--------------------|------------|--------------|--------------|--------------|--------------|--------------|--------------|---------------------|-------------|-------------|-------------|-------------|-----------------|-----|--------|-----------|----------|-----------|-------|-----|--|--|
| Model              | Intercepts |              |              | Slopes       |              |              |              | Breakpoints (#days) |             |             |             |             | Goodness of fit |     |        |           |          |           |       |     |  |  |
|                    | a1         | b1           | b2           | b3           | b4           | b5           | b6           | u1                  | u2          | u3          | u4          | u5          | rDev            | df  | Scale  | P         | AIC      | RL        | BIC   |     |  |  |
| M0                 | 6.362e+006 | 0.1035e+0002 |              |              |              |              |              |                     |             |             |             |             | 60329           | 41  | 1471.4 | 0.0       | 60744    | 0         | 60748 |     |  |  |
| M1                 | 2.989e+025 | 0.2592e+0011 | 0.0552e+0003 |              |              |              |              | 25.364e+034         |             |             |             |             | 2584            | 39  | 66.3   | 0.0       | 3003     | 0         | 3010  |     |  |  |
| M2*                | 2.561e+035 | 0.2846e+0018 | 0.1037e+0011 | 0.0412e+0005 |              |              |              | 22.971e+061         | 31.948e+104 |             |             |             | 964             | 37  | 26.1   | 2.54E-178 | 1387     | 1.06E-177 | 1398  |     |  |  |
| M3                 | 1.704e+067 | 0.3438e+0045 | 0.2196e+0027 | 0.0879e+0010 | 0.0382e+0006 |              |              | 17.748e+180         | 24.784e+083 | 33.406e+121 |             |             | 188             | 35  | 5.4    | 8.81E-23  | 615      | 6.36E-10  | 629   |     |  |  |
| M4*                | 1.704e+067 | 0.3438e+0045 | 0.2196e+0027 | 0.0893e+0012 | 0.0459e+0015 | 0.0291e+0017 |              | 17.748e+180         | 24.751e+085 | 32.679e+169 | 39.000e+420 |             | 144             | 33  | 4.4    | 6.70E-16  | 575      | 0.20      | 593   |     |  |  |
| M5                 | 4.17e+60   | 0.182        | 0.3472e+0048 | 0.2196e+0027 | 0.0893e+0012 | 0.0459e+0015 | 0.0291e+0017 | 0.0390e+0024        | 3.0390e+074 | 17.681e+177 | 24.751e+085 | 32.679e+163 | 39.000e+468     | 137 | 31     | 4.4       | 2.47E-15 | 572       |       | 593 |  |  |

\*fitted using seed breakpoint values

| Deaths in Catalonia |            |              |              |              |              |              |              |                     |             |             |             |             |                 |    |       |          |      |          |      |  |  |  |
|---------------------|------------|--------------|--------------|--------------|--------------|--------------|--------------|---------------------|-------------|-------------|-------------|-------------|-----------------|----|-------|----------|------|----------|------|--|--|--|
| Model               | Intercepts |              |              | Slopes       |              |              |              | Breakpoints (#days) |             |             |             |             | Goodness of fit |    |       |          |      |          |      |  |  |  |
|                     | a1         | b1           | b2           | b3           | b4           | b5           | b6           | u1                  | u2          | u3          | u4          | u5          | rDev            | df | Scale | P        | AIC  | RL       | BIC  |  |  |  |
| M0                  | 4.099e+020 | 0.1205e+0006 |              |              |              |              |              |                     |             |             |             |             | 6601            | 35 | 188.6 | 0.0      | 6873 | 0        | 6876 |  |  |  |
| M1                  | 0.408e+085 | 0.3127e+0044 | 0.0560e+0012 |              |              |              |              | 22.470e+087         |             |             |             |             | 340             | 33 | 10.3  | 9.92E-53 | 616  | 3.88E-66 | 622  |  |  |  |
| M2                  | 0.425e+135 | 0.3669e+0079 | 0.1350e+0040 | 0.0375e+0020 |              |              |              | 19.671e+160         | 27.312e+202 |             |             |             | 42              | 31 | 1.3   | 0.0927   | 321  | 0.035    | 331  |  |  |  |
| M3                  | 0.947e+283 | 0.4106e+0231 | 0.3245e+0122 | 0.1298e+0047 | 0.0375e+0020 |              |              | 14.640e+105         | 20.318e+191 | 27.422e+223 |             |             | 33              | 29 | 1.1   | 0.2939   | 316  | 0.48     | 329  |  |  |  |
| M4                  | 0.047e+617 | 0.2642e+1158 | 0.4674e+0478 | 0.3275e+0105 | 0.1298e+0047 | 0.0375e+0020 |              | 7.757e+133          | 13.436e+855 | 20.297e+183 | 27.422e+223 |             | 29              | 27 | 1.1   | 0.3384   | 317  | 0.31     | 333  |  |  |  |
| M5                  | 0.047e+617 | 0.2642e+1158 | 0.4674e+0478 | 0.3275e+0105 | 0.1348e+0062 | 0.0532e+0062 | 0.0301e+0042 | 7.757e+133          | 13.436e+855 | 20.228e+195 | 26.654e+325 | 31.570e+985 | 23              | 25 | 0.9   | 0.5696   | 315  |          | 334  |  |  |  |

**Supplementary Table S3.** Confidence intervals of the breakpoints estimated by segmented regressions on the total number of cases detected in Spain and the two autonomous regions hosting its two largest cities (Madrid and Catalonia) from 25/2/20 to 13/04/20, using the segmented and lme4 packages of R 3.6.3 (R Core Team 2020). Within this period, data series varies among variables and regions, since they start at the first day with >10 cases or >1 death. Only the results of the best model (i.e. the most parsimonious model with a significantly lower AIC) are presented.

| #casesIn Spain - Model 5 |       |             |            |
|--------------------------|-------|-------------|------------|
|                          | Est   | CI(95%).low | CI(95%).up |
| psi1.DaysCS              | 18,51 | 18,31       | 18,72      |
| psi2.DaysCS              | 23,92 | 23,39       | 24,45      |
| psi3.DaysCS              | 31,52 | 31,39       | 31,65      |
| psi4.DaysCS              | 36,85 | 36,61       | 37,09      |
| psi5.DaysCS              | 41,32 | 41,09       | 41,55      |

| #deaths In Spain - Model 5 |       |             |            |
|----------------------------|-------|-------------|------------|
|                            | Est.  | CI(95%).low | CI(95%).up |
| psi1.DaysDS                | 13,19 | 12,56       | 13,82      |
| psi2.DaysDS                | 23,42 | 23,01       | 23,82      |
| psi3.DaysDS                | 27,36 | 26,64       | 28,07      |
| psi4.DaysDS                | 31,71 | 31,09       | 32,34      |
| psi5.DaysDS                | 37,40 | 36,39       | 38,40      |

| #casesIn Madrid - Model 5 |       |             |            |
|---------------------------|-------|-------------|------------|
|                           | Est.  | CI(95%).low | CI(95%).up |
| psi1.DaysCM               | 10,05 | 9,38        | 10,71      |
| psi2.DaysCM               | 15,02 | 14,83       | 15,20      |
| psi3.DaysCM               | 27,10 | 26,81       | 27,40      |
| psi4.DaysCM               | 33,63 | 33,34       | 33,91      |
| psi5.DaysCM               | 40,17 | 39,61       | 40,72      |

| #deaths in Madrid - Model4 |       |             |            |
|----------------------------|-------|-------------|------------|
|                            | Est.  | CI(95%).low | CI(95%).up |
| psi1.DaysDM                | 11,02 | 10,42       | 11,61      |
| psi2.DaysDM                | 19,61 | 18,89       | 20,32      |
| psi3.DaysDM                | 24,67 | 24,03       | 25,31      |
| psi4.DaysDM                | 31,44 | 30,65       | 32,22      |

| #casesin Catalonia - Model 4 |       |             |            |
|------------------------------|-------|-------------|------------|
|                              | Est.  | CI(95%).low | CI(95%).up |
| psi1.DaysCC                  | 17,75 | 17,38       | 18,12      |
| psi2.DaysCC                  | 24,75 | 24,58       | 24,92      |
| psi3.DaysCC                  | 32,68 | 32,34       | 33,02      |
| psi4.DaysCC                  | 39,00 | 38,15       | 39,85      |

| #deaths In Catalonia - Model 3 |       |             |            |
|--------------------------------|-------|-------------|------------|
|                                | Est.  | CI(95%).low | CI(95%).up |
| psi1.DaysDC                    | 14,64 | 12,42       | 16,86      |
| psi2.DaysDC                    | 20,32 | 19,93       | 20,71      |
| psi3.DaysDC                    | 27,42 | 26,97       | 27,88      |



**Supplementary Figure S1.** Scheme of the key events related with the timeline of the COVID-19 pandemic in Spain, including the breaking points in the growth curves of the number of cases and deaths, at the time of detection (right column) and the estimated time of infection (left column). See summary in Figure 2, and Supplementary Table S1 for a detailed account of the timetable. Black numbers: change of slope at the breaking points of R's segmented fits (all negative unless preceded by a + symbol). Red numbers: change of slope at the breaking points of R's strucchange fits (all negative unless preceded by a + symbol). Blue blocks: clusters of breakpoints associated to decreases in slopes (growth rates). Blue blocks: cluster of breakpoints associated to increases in slopes (growth rates) or intercepts (one-day 'jumps' in values).

| DATE       | INFECTION |        |           |         |        |           | TIMELINE OF EVENTS<br>AND POLICY MEASURES                                         | DETECTION |        |           |         |        |           |  |
|------------|-----------|--------|-----------|---------|--------|-----------|-----------------------------------------------------------------------------------|-----------|--------|-----------|---------|--------|-----------|--|
|            | #cases    |        |           | #deaths |        |           |                                                                                   | #cases    |        |           | #deaths |        |           |  |
|            | Spain     | Madrid | Catalonia | Spain   | Madrid | Catalonia |                                                                                   | Spain     | Madrid | Catalonia | Spain   | Madrid | Catalonia |  |
| February 9 |           |        |           |         |        |           | 2nd case in Spain                                                                 |           |        |           |         |        |           |  |
| 10         |           |        |           |         |        |           |                                                                                   |           |        |           |         |        |           |  |
| 11         |           |        |           |         |        |           |                                                                                   |           |        |           |         |        |           |  |
| 12         |           |        |           |         |        |           |                                                                                   |           |        |           |         |        |           |  |
| 13         |           |        |           |         |        |           |                                                                                   |           |        |           |         |        |           |  |
| 14         |           |        |           |         |        |           | 1st death                                                                         |           |        |           |         |        |           |  |
| 15         |           |        |           |         |        |           | Infection 1st known in Madrid                                                     |           |        |           |         |        |           |  |
| 16         |           |        |           |         |        |           | 2nd case in Madrid                                                                |           |        |           |         |        |           |  |
| 17         |           |        |           |         |        |           |                                                                                   |           |        |           |         |        |           |  |
| 18         |           |        |           |         |        |           |                                                                                   |           |        |           |         |        |           |  |
| 19         |           |        |           |         |        |           | Soccer game at Bergamo                                                            |           |        |           |         |        |           |  |
| 20         |           |        |           |         |        |           | National identification, testing & treatment guidelines                           |           |        |           |         |        |           |  |
| 21         |           |        |           |         |        |           |                                                                                   |           |        |           |         |        |           |  |
| 22         |           |        |           |         |        |           | Infection of 1st case known in Barcelona                                          |           |        |           |         |        |           |  |
| 23         |           |        |           |         |        |           |                                                                                   |           |        |           |         |        |           |  |
| 24         |           |        |           |         |        |           | Group infection in Alava & Rioja                                                  |           |        |           |         |        |           |  |
| 25         |           |        |           |         |        |           | Updated treatment guidelines                                                      |           |        |           |         |        |           |  |
| 26         |           |        |           |         |        |           | EC requests preparedness plans                                                    |           |        |           |         |        |           |  |
| 27         |           |        |           |         |        |           | Regulations for preventive isolation at work                                      |           |        |           |         |        |           |  |
| 28         |           |        |           |         |        |           | National protocol for ICUs. Infection cluster at Igualada hospital (Catalonia)    |           |        |           |         |        |           |  |
| 29         |           |        |           |         |        |           | Detection of group infections at La Rioja, Leganés and Torrejón                   |           |        |           |         |        |           |  |
| March 1    |           |        |           |         |        |           | Community transmission detected in Catal.                                         |           |        |           |         |        |           |  |
| 2          |           |        |           |         |        |           | National guidelines Covid prevention at work                                      |           |        |           |         |        |           |  |
| 3          |           |        |           |         |        |           | Outbreaks at Madrid nursing homes                                                 |           |        |           |         |        |           |  |
| 4          |           |        |           |         |        |           | Prevention measures in Catholic churches                                          |           |        |           |         |        |           |  |
| 5          |           |        |           |         |        |           | Closure of nursing homes (Madrid)                                                 |           |        |           |         |        |           |  |
| 6          |           |        |           |         |        |           | IWD demonstrations & sport events                                                 |           |        |           |         |        |           |  |
| 7          |           |        |           |         |        |           | Closure schools Madrid, Vitoria & Labastida                                       |           |        |           |         |        |           |  |
| 8          |           |        |           |         |        |           | Air travel ban & soc-distancing measures                                          |           |        |           |         |        |           |  |
| 9          |           |        |           |         |        |           | OMS declares international pandemia                                               |           |        |           |         |        |           |  |
| 10         |           |        |           |         |        |           | Nationwide closure schools and universities, Catalonia locks down 4 villages      |           |        |           |         |        |           |  |
| 11         |           |        |           |         |        |           | Nationwide lockdown                                                               |           |        |           |         |        |           |  |
| 12         |           |        |           |         |        |           |                                                                                   |           |        |           |         |        |           |  |
| 13         |           |        |           |         |        |           |                                                                                   |           |        |           |         |        |           |  |
| 14         |           |        |           |         |        |           |                                                                                   |           |        |           |         |        |           |  |
| 15         |           |        |           |         |        |           |                                                                                   |           |        |           |         |        |           |  |
| 16         |           |        |           |         |        |           | Ford closes factory in Valencia                                                   |           |        |           |         |        |           |  |
| 17         |           |        |           |         |        |           | EU bans travel, Spain closes borders                                              |           |        |           |         |        |           |  |
| 18         |           |        |           |         |        |           |                                                                                   |           |        |           |         |        |           |  |
| 19         |           |        |           |         |        |           |                                                                                   |           |        |           |         |        |           |  |
| 20         |           |        |           |         |        |           |                                                                                   |           |        |           |         |        |           |  |
| 21         |           |        |           |         |        |           | 640k rapid tests purchased, >350k conducted                                       |           |        |           |         |        |           |  |
| 22         |           |        |           |         |        |           | Opening IFEMA temporary hospital                                                  |           |        |           |         |        |           |  |
| 23         |           |        |           |         |        |           | Military intervene nursing homes                                                  |           |        |           |         |        |           |  |
| 24         |           |        |           |         |        |           | Madrid ice rink becomes mortuary                                                  |           |        |           |         |        |           |  |
| 25         |           |        |           |         |        |           |                                                                                   |           |        |           |         |        |           |  |
| 26         |           |        |           |         |        |           | Closure of hotels                                                                 |           |        |           |         |        |           |  |
| 27         |           |        |           |         |        |           | Madrid launches emergency plan at nursing homes, together with firemen & military |           |        |           |         |        |           |  |
| 28         |           |        |           |         |        |           |                                                                                   |           |        |           |         |        |           |  |
| 29         |           |        |           |         |        |           |                                                                                   |           |        |           |         |        |           |  |
| 30         |           |        |           |         |        |           | Strengthened lockdown: closure of all non-essential activities                    |           |        |           |         |        |           |  |
| 31         |           |        |           |         |        |           |                                                                                   |           |        |           |         |        |           |  |
| April 1    |           |        |           |         |        |           | Military disinfect 84 nursing homes in Catal.                                     |           |        |           |         |        |           |  |
| 2          |           |        |           |         |        |           | COVID basic reproduction number <1.0                                              |           |        |           |         |        |           |  |
| 3          |           |        |           |         |        |           |                                                                                   |           |        |           |         |        |           |  |
| 4          |           |        |           |         |        |           |                                                                                   |           |        |           |         |        |           |  |
| 5          |           |        |           |         |        |           |                                                                                   |           |        |           |         |        |           |  |
| 6          |           |        |           |         |        |           |                                                                                   |           |        |           |         |        |           |  |
| 7          |           |        |           |         |        |           |                                                                                   |           |        |           |         |        |           |  |
| 8          |           |        |           |         |        |           |                                                                                   |           |        |           |         |        |           |  |
| 9          |           |        |           |         |        |           |                                                                                   |           |        |           |         |        |           |  |
| 10         |           |        |           |         |        |           |                                                                                   |           |        |           |         |        |           |  |
| 11         |           |        |           |         |        |           |                                                                                   |           |        |           |         |        |           |  |
| 12         |           |        |           |         |        |           |                                                                                   |           |        |           |         |        |           |  |
| 13         |           |        |           |         |        |           |                                                                                   |           |        |           |         |        |           |  |



**Supplementary Figure S2.** Results of the simultaneous estimation of multiple breakpoints in segmented regressions fitted using the `breakpoints` function of R's `strucchange` package, on the total number of cases detected in Spain and the two autonomous regions hosting its two largest cities (Madrid and Catalonia) from 25/2/20 to 13/04/20. Within this period, data series varies among variables and regions, since they start at the first day with >10 cases or >1 death. Lines show the best fit, i.e. that with the lowest BIC (see also Supplementary Figure S3). Red dots indicate breaking points of the best fit, with 95% confidence intervals (red lines).

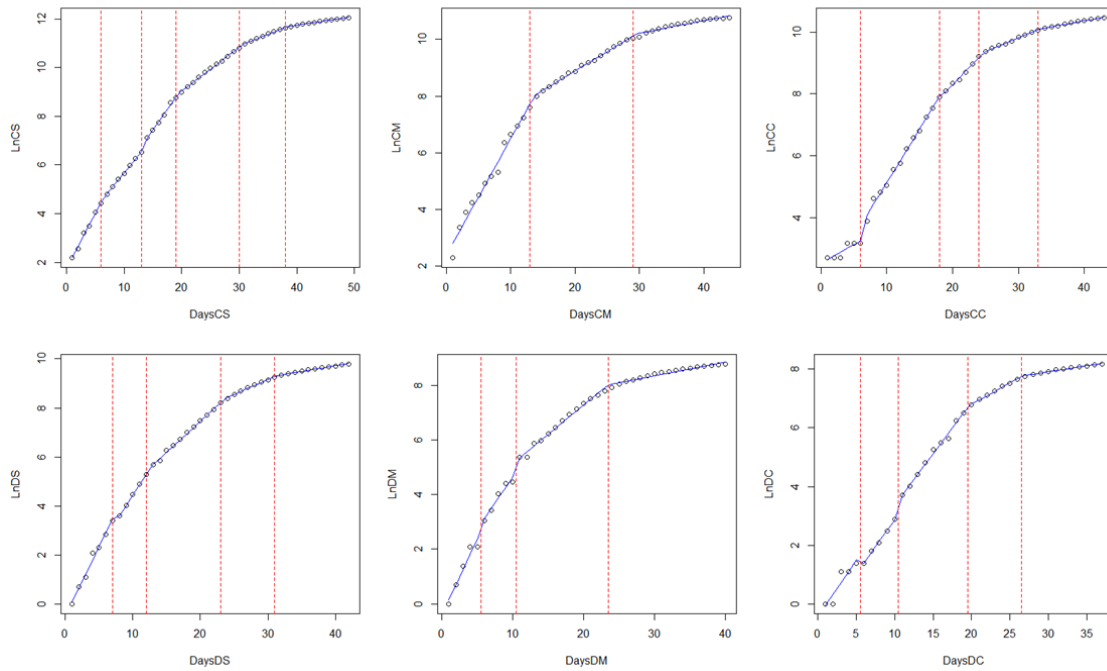

**Supplementary Figure S3.** Results of the simultaneous estimation of multiple breakpoints in segmented regressions fitted using the `breakpoints` function of R's `strucchange` package, on the total number of cases detected in Spain and the two autonomous regions hosting its two largest cities (Madrid and Catalonia) from 25/2/20 to 13/04/20. Graphs show two goodness-of-fit parameters, the Bayesian Information Criterion (BIC, black lines and dots) and Residual Sum of Squares (blue lines and symbols) of a set of eight different models ranging from zero to seven breakpoints. The models with the lowest BIC was taken as the best fits and corresponds to the lines displayed in Supplementary Figure S3.

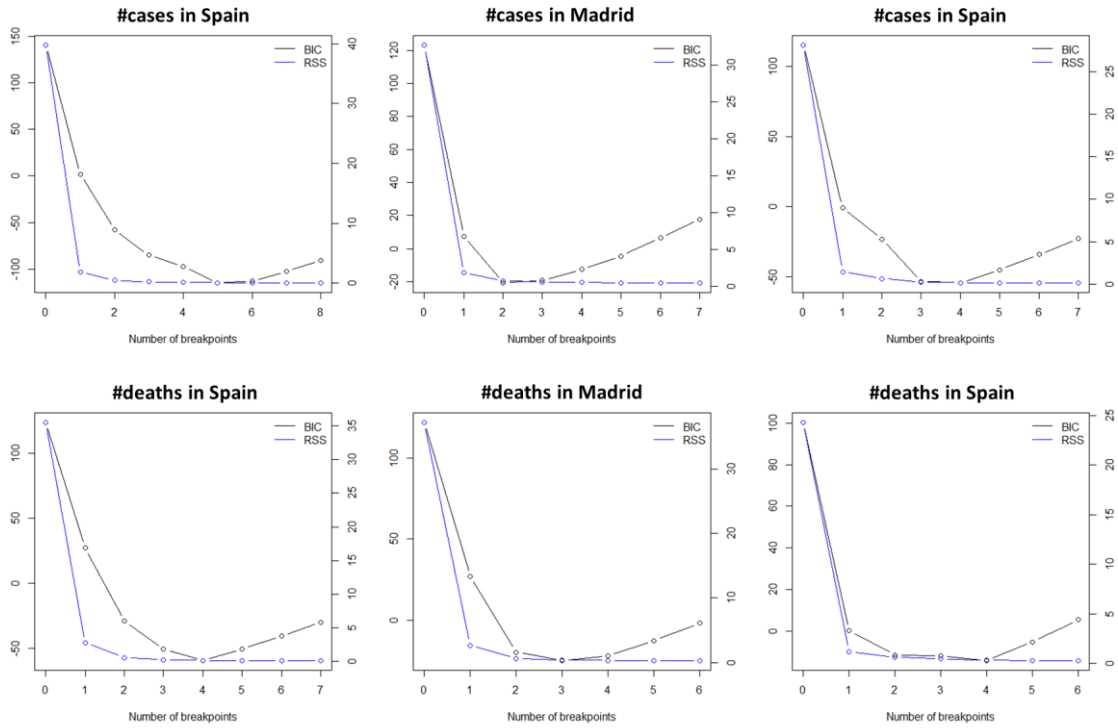

Supplement: Supplementary file [file 2020.04.09.20059345-1.pdf]
